# Supplementary material
Source: MDPI journal article supplement (https://www.mdpi.com/2077-1312/11/9/1753)
Supplement: s1 [file s1]

**Table S1.** Lithological and geochemical properties of meromictic water bodies sediments separated from the White Sea.

| Station               | Positions                    | Sediment description                                                          | Depth,<br>m | Sand,<br>%        | Silt,<br>% | Pelite,<br>% | Moisture,<br>% | TOC,<br>% | TIC,<br>% | S <sub>tot</sub> ,<br>% |
|-----------------------|------------------------------|-------------------------------------------------------------------------------|-------------|-------------------|------------|--------------|----------------|-----------|-----------|-------------------------|
| Lake Kislo-Sladkoe    |                              |                                                                               |             |                   |            |              |                |           |           |                         |
| KS-1                  | N66.54903333<br>E33.13398333 | Green-brown pelitic mud                                                       | 0.4         | 4.6               | 8.0        | 87.4         | 86.0           | 7.4       | 4.1       | 0.57                    |
| KS-2                  | N66.54823333<br>E33.13720000 | Dark green-brown silty pelitic mud<br>with admixture of coarse sand           | 0.3         | 10.1              | 2.4        | 85.3         | 56.4           | 3.2       | 5.2       | 0.58                    |
| KS-3                  | N66.54775000<br>E33.13548333 | Gray-bluish silty sand                                                        | 0.2         | 59.2              | 27.3       | 13.3         | 37.9           | 0.7       | 0.7       | 0.12                    |
| KS-4                  | N66.54850000<br>E33.13461667 | Dark green-brown silty pelitic mud<br>with admixture of coarse sand           | 2           | 11.0              | 22.3       | 64.4         | 65.9           | 3.6       | 1.2       | 0.31                    |
| KS-5                  | N66.54850000<br>E33.13486667 | Green-biege silty-pelitic mud                                                 | 2.5         | n.d. <sup>1</sup> | n.d.       | n.d.         | n.d.           | 3.3       | 1.6       | 0.30                    |
| KS-6                  | N66.54840000<br>E33.13530000 | Black pelitic mud with thin dark<br>brown inter layer, H <sub>2</sub> S smell | 3.7         | n.d.              | n.d.       | n.d.         | n.d.           | 9.8       | 8.1       | 1.17                    |
| Lagoon on Cape Zeleny |                              |                                                                               |             |                   |            |              |                |           |           |                         |
| ZC-1                  | N66.53161667<br>E33.09598333 | Dark gray poorly sorted sand, silty,<br>with upper thin beige-green layer     | 0.3         | 31.8              | 6.6        | 60.2         | 34.7           | 1.0       | 1.0       | 0                       |
| ZC-2                  | N66.52971667<br>E33.09370000 | Gray poorly sorted silty sand                                                 | 0.2         | 27.5              | 10.1       | 61.6         | 42.5           | 0.7       | 0.9       | 0                       |
| ZC-3                  | N66.52968333<br>E33.09591667 | Poorly sorted silty sand                                                      | 0.3         | 38                | 31.9       | 29.4         | 69.0           | 1.4       | 1.2       | 0.13                    |
| ZC-4                  | N66.53060000<br>E33.95166667 | Silty pelitic mud with beige green fine<br>sand of light tint                 | 3.0         | 27.2              | 15.0       | 56.9         | 62.6           | 3.8       | 2.0       | 0.38                    |
| ZC-5                  | N66.53022000<br>E33.09466667 | Light black pelitic mud, H <sub>2</sub> S smell                               | 6.2         | 2.9               | 3.9        | 93.2         | 91.2           | 8.6       | 4.0       | 1.06                    |

| Biofilters Bay            |                              |                                                                                                                                   |       |      |      |      |      |      |      |      |
|---------------------------|------------------------------|-----------------------------------------------------------------------------------------------------------------------------------|-------|------|------|------|------|------|------|------|
| BB                        | N66.54066667<br>E33.16496667 | Sand                                                                                                                              | 0.3   | 61.0 | 7.8  | 17.5 | 10.1 | 0.02 | 0.3  | 0    |
| Bol'shie Khruslomeny Lake |                              |                                                                                                                                   |       |      |      |      |      |      |      |      |
| BK-1                      | N66.71798333<br>E32.85085000 | Silty-pelitic mud with admixture of beige-green fine sand with black spots and H <sub>2</sub> S smell                             | 0.9   | 9.1  | 11.1 | 79.8 | 64.3 | 6.1  | 2.8  | 0.53 |
| BK -2                     | N66.71771667<br>E32.85240000 | Willow green pelitic mud, with black spots and H <sub>2</sub> S smell                                                             | 3.2   | 2.4  | 0.9  | 96.6 | 86.3 | 23.3 | 0    | 1.48 |
| BK-3                      | N66.71683333<br>E32.85701667 | Pelitic jellylike mud with dark-willow green inclusions, with strong H <sub>2</sub> S smell                                       | 12.54 | 0.7  | 1.0  | 98.3 | 93.8 | 14.6 | 3.8  | 1.91 |
| Lobanikha Bay             |                              |                                                                                                                                   |       |      |      |      |      |      |      |      |
| BL-1                      | N66.55615000<br>E33.23388333 | Green-beige coarse- and medium-grained silty sediment with shell debris and H <sub>2</sub> S smell                                | 0.1   | 57.5 | 25.1 | 16.5 | 21.4 | 0.2  | 0.2  | 0    |
| BL-3                      | N66.55477000<br>E33.24561667 | Silty-pelitic mud with an admixture of sand, light beige color                                                                    | 2.5   | 24.3 | 33.3 | 42.4 | 48.8 | 1.8  | 0.7  | 0.09 |
| BL-4                      | N66.55663333<br>E33.23578333 | Silty-pelitic mud with an admixture of fine sand, beige-brown in color with inclusions of black lenses and H <sub>2</sub> S smell | 9.5   | 9.0  | 13.8 | 77.2 | 65.7 | 4.6  | 2.1  | 0.37 |
| Trekhtzvetnoe Lake        |                              |                                                                                                                                   |       |      |      |      |      |      |      |      |
| T-1                       | N66.59325000<br>E32.97688333 | Light beige pelite mud with inclusions of dark green and black interlayers with macrophyte filaments                              | 1.3   | 1.3  | 5.8  | 92.9 | 86.0 | 8.5  | 2.50 | 0.55 |
| T-2                       | N66.59275000<br>E32.97800000 | Watered black pelitic mud with black spots, strong H <sub>2</sub> S smell                                                         | 3.5   | 0.00 | 1.4  | 98.6 | 83.2 | 8.7  | 0.90 | 1.11 |
| T-3                       | N66.59242000<br>E32.97807000 | Watered black pelitic mud with light black spots. Strong H <sub>2</sub> S smell                                                   | 6.0   | 0.00 | 1.1  | 98.9 | 83.1 | 10.6 | 3.20 | 1.65 |
| Kislaya Bay               |                              |                                                                                                                                   |       |      |      |      |      |      |      |      |

|      |                              |                                                                                                                         |     |      |      |      |      |     |     |   |
|------|------------------------------|-------------------------------------------------------------------------------------------------------------------------|-----|------|------|------|------|-----|-----|---|
| KB-1 | N66.53661666<br>E33.09300000 | Fine-grained sand with admixture of<br>silty-pelitic fraction, black inclusions of<br>organic detritus and shell debris | 0.2 | 69.4 | 19.3 | 10.7 | 21.0 | 0.2 | 0.1 | 0 |
|------|------------------------------|-------------------------------------------------------------------------------------------------------------------------|-----|------|------|------|------|-----|-----|---|

<sup>1</sup> n.d. – not data
